# Supplementary material for: Description and validation of Vehicular Emissions from Road Traffic (VERT) 1.0, an R-based framework for estimating road transport emissions from traffic flows
Source: Copernicus journal article supplement (doi:10.5194/gmd-17-6465-2024), 2024-08-30
Supplement: Supplementary file 1 [file gmd-17-6465-2024-supplement.pdf]

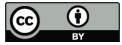

*Supplement of*

## **Description and validation of Vehicular Emissions from Road Traffic (VERT) 1.0, an R-based framework for estimating road transport emissions from traffic flows**

**Giorgio Veratti et al.**

*Correspondence to:* Giorgio Veratti ([giorgio.veratti@unimore.it](mailto:giorgio.veratti@unimore.it))

The copyright of individual parts of the supplement might differ from the article licence.

## S1 Vignette documentation for emissions estimation using VERT

```
# Install package from source
install.packages("path/to/file/vert_1.0.tar.gz", repos = NULL, type="source")

suppressMessages(library(sf))
suppressMessages(library(ggplot2))
suppressMessages(library(dplyr))
suppressMessages(library(vert))

# Generate sample data to simulate traffic flows within a fictitious road network
# Create LINESTRING geometries
v_coords <- matrix(c(1, 3, 2, 1, 3, 3), ncol = 2, byrow = TRUE)
e_coords <- matrix(c(5, 1, 4, 1, 4, 2, 5, 2, 4, 2, 4, 3, 5, 3),
                  ncol = 2, byrow = TRUE)
r_coords <- matrix(c(6, 1, 6, 3, 7, 3, 7, 2, 6, 2, 7, 1), ncol = 2, byrow = TRUE)
t_coords <- matrix(c(8, 3, 9, 3, 9, 1, 9, 3, 10, 3), ncol = 2, byrow = TRUE)
v_linestring <- st_linestring(v_coords)
e_linestring <- st_linestring(e_coords)
r_linestring <- st_linestring(r_coords)
t_linestring <- st_linestring(t_coords)

# Create a data frame
letters_df <- data.frame(letter = c("V", "E", "R", "T"),
                        geometry = st_sfc(v_linestring,
                                          e_linestring,
                                          r_linestring,
                                          t_linestring),
                        stringsAsFactors = FALSE)

# Convert the data frame to an sf object and add necessary data
road_network <- road_network_2023ef <- st_sf(data = letters_df) %>%
  ## Assign CRS
  st_set_crs("+proj=utm +zone=32 +datum=WGS84 +units=m +no_defs") %>%
  ## Compute the road length for each segment, in kilometre.
  mutate(road.length = as.numeric(st_length(geometry)) / 1000,
         ## Let's create some dummy data.
         ## Number of passenger cars traveling for each road segment.
         traffic.flux.pc = c(100, 75, 50, 30),
         ## Number of mopeds/motorcycle traveling for each road segment.
         traffic.flux.Lcat = c(10, 40, 10, 5),
         ## Number of Light Commercial vehicles traveling for each road segment.
         traffic.flux.lcv = c(15, 15, 30, 10),
         ## Number of Heavy commercial vehicles traveling for each road seg.
         traffic.flux.hcv = c(2, 7, 5, 10),
         ## Reference speed for passenger cars in km/h.
```

```

traffic.speed.pc = 70,
## Reference speed for mopeds/motorcycle in km/h.
traffic.speed.lcat = 45,
## Reference speed for Light Commercial vehicles in km/h.
traffic.speed.lcv = 60,
## Reference speed for Heavy Commercial vehicles in km/h.
traffic.speed.hcv = 50,
## Type of traffic
traffic.type = c("Urban Peak", "Urban Off Peak", "Rural", "Highway"),
## Road slope
road.slope = c(-0.02, 0, 0.02, 0.04),
## Load of Heavy Commercial vehicles.
hdv.load = c(0, 0.5, 0.5, 1),
## Grams per square meter of silt loading on the road surface.
## This information is exclusively required for the resuspension
## calculation conducted using the EPA methodology.
sL = c(0.2, 0.3, 0.4, 0.5)

```

*# Let's plot the road network*

```

ggplot() +
  geom_sf(data = road_network, aes(color = letter), size = 2) +
  theme_minimal() +
  theme(legend.position = "none")

```

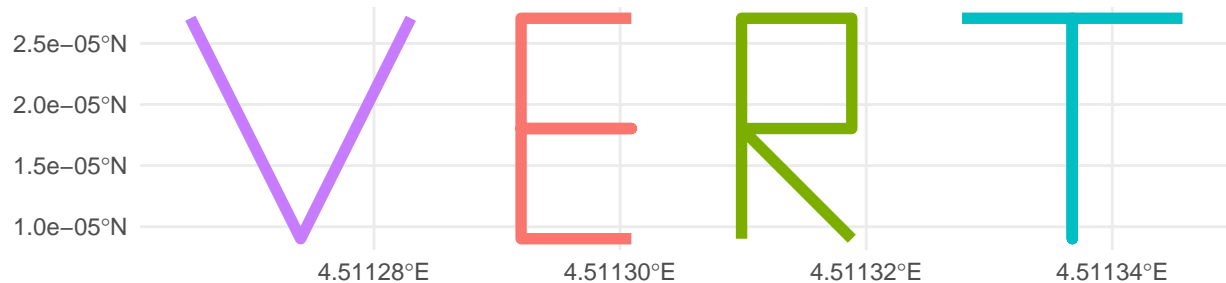

*# After preparing the road network with traffic data, the next step is to set up  
# the fleet composition data frame.*

*# This involves defining four distinct traffic fluxes for Passenger cars,  
# mopeds/motorcycles, Light Commercial vehicles, and Heavy Commercial vehicles.  
# To streamline this process, refer to the "fleet\_example\_4fluxes" data frame  
# included in the package:*

```
View(fleet_example_4fluxes)
```

*# It's important to note that the order of each class is predefined. The columns  
# "perc\_urban," "perc\_rural," and "perc\_highway" represent the percentage  
# breakdown of the fleet composition for Urban Peak/Urban Off Peak, Rural and  
# Highway road types, respectively.*

*# Given that we are working with four distinct traffic fluxes, the sum of each  
# column must be 4. Specifically, rows 1 to 325 pertain to Passenger cars and  
# should sum to 1. Rows 326 to 371 are allocated to mopeds/motorcycles and must  
# also sum to 1. Rows 372 to 459 correspond to Light Commercial vehicles and  
# should total 1. Finally, rows 460 to 666 are designated for Heavy Commercial  
# vehicles and must sum to 1.*

*# The "year" column denotes the reference year for the vehicle's sold year.*

```
# This information helps estimate the approximate age of a certain category and
# subsequently the distance it might have traveled. Users can adjust the years
# based on their preferences. Feel free to leave other columns unchanged.
```

```
# Let's compute the exhaust emissions for some pollutants using the traffic
# data previously created and the fleet composition available in the package.
```

```
for(pol in c("CO", "VOC", "SO2", "NH3", "N2O")){

    ## Use here your fleet composition.
    road_network <- main(fleet = fleet_example_4fluxes,
        ## This is your reference road network.
        traffic.df = road_network,
        ## Number of traffic classes,
        ## in this case PC, Lcat, LCV and HCV.
        n.traffic.flux = 4,
        ## Emission factors reference year,
        ## two options are available: 2020 & 2023
        emep.eea.year = 2020,
        ## Pollutant of interest
        pollutant = pol,
        ## Emission type
        emis.type = "exhaust",
        ## The mileage share attributed to urban conditions (km).
        Surb = 0.804,
        ## The mean trip distance (km).
        L.trip = 2.5,
        ## Ambient temperature in Celsius degree (°C).
        Ta = 8.5,
        ## The simulation year. it is used to estimate the
        ## distance travelled by each vehicle category.
        reference.year = 2023,
        ## Sulfur content in diesel blend (ppm).
        sulphur.diesel = 10,
        ## Sulfur content in petrol blend (ppm).
        sulphur.petrol = 10,
        ## Sulfur content in lubricant oil (ppm).
        sulphur.lube = 1000,
        ## "single.core" or "multi.core" computation
        computation = "single.core",
        ## Write or not a log file
        log.file = F)

}
```

```
# Take a look at the new columns
```

```
road_network
```

```
## Simple feature collection with 4 features and 19 fields
## Geometry type: LINESTRING
## Dimension: XY
## Bounding box: xmin: 1 ymin: 1 xmax: 10 ymax: 3
## CRS: +proj=utm +zone=32 +datum=WGS84 +units=m +no_defs
## letter geometry road.length traffic.flux.pc
## 1 V LINESTRING (1 3, 2 1, 3 3) 0.004472136 100
```

```

## 2      E LINESTRING (5 1, 4 1, 4 2, ... 0.006000000          75
## 3      R LINESTRING (6 1, 6 3, 7 3, ... 0.006414214          50
## 4      T LINESTRING (8 3, 9 3, 9 1, ... 0.006000000          30
##   traffic.flux.Lcat traffic.flux.lcv traffic.flux.hcv traffic.speed.pc
## 1           10           15           2           70
## 2           40           15           7           70
## 3           10           30           5           70
## 4            5           10          10           70
##   traffic.speed.Lcat traffic.speed.lcv traffic.speed.hcv   traffic.type
## 1           45           60           50   Urban Peak
## 2           45           60           50 Urban Off Peak
## 3           45           60           50   Rural
## 4           45           60           50   Highway
##   road.slope hdv.load  sL      emis_CO      emis_VOC      emis_SO2      emis_NH3
## 1    -0.02    0.0 0.2 0.0007331939 1.914952e-04 7.242136e-07 7.427194e-06
## 2     0.00    0.5 0.3 0.0016243768 5.325562e-04 1.190059e-06 9.211000e-06
## 3     0.02    0.5 0.4 0.0007577965 1.590683e-04 1.087168e-06 8.824058e-06
## 4     0.04    1.0 0.5 0.0002595472 6.674373e-05 1.143903e-06 5.018285e-06
##       emis_N20
## 1 8.356665e-06
## 2 9.726834e-06
## 3 3.530245e-06
## 4 2.241127e-06

```

```

# Let's test the multi core computation for other pollutants.
# Please note that the 'parallel' package is required.
for(pol in c("NOx", "CH4", "PM Exhaust")){
  ## Use here your fleet composition.
  road_network <- main(fleet = fleet_example_4fluxes,
    ## This is your reference road network.
    traffic.df = road_network,
    ## Number of traffic classes,
    ## in this case PC, Lcat, LCV and HCV.
    n.traffic.flux = 4,
    ## Emission factors reference year,
    ## two options are available: 2020 & 2023
    emep.eea.year = 2020,
    ## Pollutant of interest
    pollutant = pol,
    ## Emission type
    emis.type = "exhaust",
    ## The mileage share attributed to urban conditions (km).
    Surb = 0.804,
    ## The mean trip distance (km).
    L.trip = 2.5,
    ## Ambient temperature in Celsius degree (°C).
    Ta = 8.5,
    ## The simulation year. it is used to estimate the distance
    ## travelled by each vehicle category.
    reference.year = 2023,
    ## Sulfur content in diesel blend (ppm).
    sulphur.diesel = 10,
    ## Sulfur content in petrol blend (ppm).
    sulphur.petrol = 10,

```

```

    ## Sulfur content in lubricant oil (ppm).
    sulphur.lube = 1000,
    ## "single.core" or "multi.core" computation
    computation = "multi.core",
    ## Number of cores
    n.core = 4)
}

# Take a look at the new columns
road_network

## Simple feature collection with 4 features and 22 fields
## Geometry type: LINESTRING
## Dimension: XY
## Bounding box: xmin: 1 ymin: 1 xmax: 10 ymax: 3
## CRS: +proj=utm +zone=32 +datum=WGS84 +units=m +no_defs
## letter geometry road.length traffic.flux.pc
## 1 V LINESTRING (1 3, 2 1, 3 3) 0.004472136 100
## 2 E LINESTRING (5 1, 4 1, 4 2, ... 0.006000000 75
## 3 R LINESTRING (6 1, 6 3, 7 3, ... 0.006414214 50
## 4 T LINESTRING (8 3, 9 3, 9 1, ... 0.006000000 30
## traffic.flux.Lcat traffic.flux.lcv traffic.flux.hcv traffic.speed.pc
## 1 10 15 2 70
## 2 40 15 7 70
## 3 10 30 5 70
## 4 5 10 10 70
## traffic.speed.Lcat traffic.speed.lcv traffic.speed.hcv traffic.type
## 1 45 60 50 Urban Peak
## 2 45 60 50 Urban Off Peak
## 3 45 60 50 Rural
## 4 45 60 50 Highway
## road.slope hdv.load sL emis_CO emis_VOC emis_SO2 emis_NH3
## 1 -0.02 0.0 0.2 0.0007331939 1.914952e-04 7.242136e-07 7.427194e-06
## 2 0.00 0.5 0.3 0.0016243768 5.325562e-04 1.190059e-06 9.211000e-06
## 3 0.02 0.5 0.4 0.0007577965 1.590683e-04 1.087168e-06 8.824058e-06
## 4 0.04 1.0 0.5 0.0002595472 6.674373e-05 1.143903e-06 5.018285e-06
## emis_N2O emis_NOx emis_CH4 emis_PM.Exhaust
## 1 8.356665e-06 0.0002872645 9.049042e-06 5.988979e-06
## 2 9.726834e-06 0.0004639886 2.306441e-05 1.236062e-05
## 3 3.530245e-06 0.0005434518 7.171920e-06 6.855393e-06
## 4 2.241127e-06 0.0006820063 2.895485e-06 1.097837e-05

# Let's examine the output generated using the updated emission factors from 2023.
for(pol in c("NOx", "CH4", "PM Exhaust")){
  ## Use here your fleet composition.
  road_network_2023ef <- main(fleet = fleet_example_4fluxes,
  ## This is your reference road network.
  traffic.df = road_network,
  ## Is the number of traffic classes,
  ## in this case PC, Lcat, LCV and HCV.
  n.traffic.flux = 4,
  ## Emission factors reference year,
  ## two are options available: 2020 & 2023

```

```

emep.eea.year = 2023,
## Pollutant of interest
pollutant = pol,
## Emission type
emis.type = "exhaust",
## The mileage share attributed to urban
## conditions (km).
Surb = 0.804,
## The mean trip distance (km).
L.trip = 2.5,
## Ambient temperature in Celsius degree (°C).
Ta = 8.5,
## The simulation year. it is used to estimate
## the distance travelled by each
## vehicle category.
reference.year = 2023,
## Sulfur content in diesel blend (ppm).
sulphur.diesel = 10,
## Sulfur content in petrol blend (ppm).
sulphur.petrol = 10,
## Sulfur content in lubricant oil (ppm).
sulphur.lube = 1000,
## "single.core" or "multi.core" computation
computation = "multi.core",
## Number of cores
n.core = 4)
}

# Take a look at the road_network_2023ef
road_network_2023ef

```

```

## Simple feature collection with 4 features and 23 fields
## Geometry type: LINESTRING
## Dimension: XY
## Bounding box: xmin: 1 ymin: 1 xmax: 10 ymax: 3
## CRS: +proj=utm +zone=32 +datum=WGS84 +units=m +no_defs
## letter geometry road.length traffic.flux.pc
## 1 V LINESTRING (1 3, 2 1, 3 3) 0.004472136 100
## 2 E LINESTRING (5 1, 4 1, 4 2, ... 0.006000000 75
## 3 R LINESTRING (6 1, 6 3, 7 3, ... 0.006414214 50
## 4 T LINESTRING (8 3, 9 3, 9 1, ... 0.006000000 30
## traffic.flux.Lcat traffic.flux.lcv traffic.flux.hcv traffic.speed.pc
## 1 10 15 2 70
## 2 40 15 7 70
## 3 10 30 5 70
## 4 5 10 10 70
## traffic.speed.Lcat traffic.speed.lcv traffic.speed.hcv traffic.type
## 1 45 60 50 Urban Peak
## 2 45 60 50 Urban Off Peak
## 3 45 60 50 Rural
## 4 45 60 50 Highway
## road.slope hdv.load sL emis_CO emis_VOC emis_SO2 emis_NH3

```

```
## 1      -0.02      0.0 0.2 0.0007331939 1.914952e-04 7.242136e-07 7.427194e-06
## 2       0.00      0.5 0.3 0.0016243768 5.325562e-04 1.190059e-06 9.211000e-06
## 3       0.02      0.5 0.4 0.0007577965 1.590683e-04 1.087168e-06 8.824058e-06
## 4       0.04      1.0 0.5 0.0002595472 6.674373e-05 1.143903e-06 5.018285e-06
##      emis_N2O      emis_NOx      emis_CH4 emis_PM.Exhaust emis_PM.Exhaust
## 1 8.356665e-06 0.0002872645 9.049042e-06 5.988979e-06 5.250522e-06
## 2 9.726834e-06 0.0004639886 2.306441e-05 1.236062e-05 1.123473e-05
## 3 3.530245e-06 0.0005434518 7.171920e-06 6.855393e-06 6.240712e-06
## 4 2.241127e-06 0.0006820063 2.895485e-06 1.097837e-05 1.071503e-05
```

```
# Let's plot the PM2.5 emissions generated with VERT
```

```
ggplot() +
  geom_sf(data = road_network, aes(color = emis_PM.Exhaust), size = 2) +
  theme_minimal() +
  labs(color = expression(paste(PM[2.5], " ", "(", "kg ", h^{-1}, ")")))
```

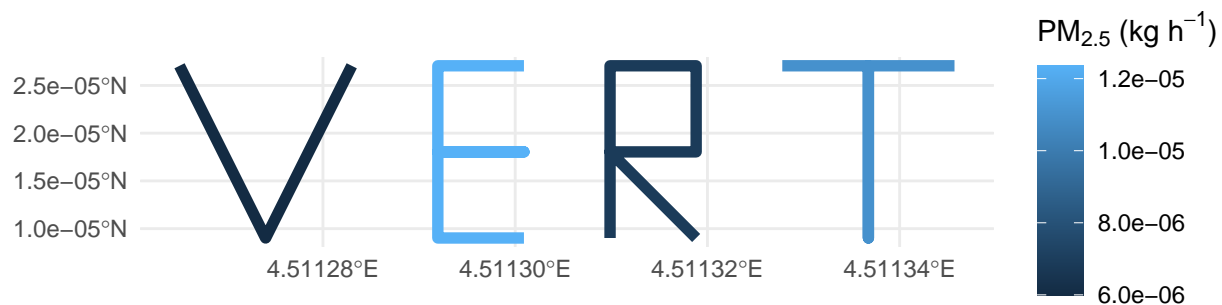

```
# Running Losses evaporative emissions
```

```
for(pol in c("VOC")){

  road_network <- main(fleet = fleet_example_4fluxes,
    traffic.df = road_network,
    n.traffic.flux = 4,
    pollutant = pol,
    emis.type = "evaporative-running_losses",
    wear.source = NA,
    Surb = 0.804,
    L.trip = 12.5,
    perc.wet.d = 0.2,
    Ta = 8.5,
    reference.year = 2020,
    sulphur.diesel = 10,
    sulphur.petrol = 10,
    sulphur.lube = 1000,
    computation = "multi.core",
    n.core = 4)

}
```

```
# Resuspension emissions using the EPA formula
```

```
for(pol in c("PM10")){

  road_network <- main(fleet = fleet_example_4fluxes,
    traffic.df = road_network,
    n.traffic.flux = 4,
    pollutant = pol,
```



```

    emis.type = "resuspension-EPA",
    wear.source = NA,
    Surb = 0.804,
    L.trip = 12.5,
    perc.wet.d = 0.2,
    Ta = 8.5,
    reference.year = 2020,
    sulphur.diesel = 10,
    sulphur.petrol = 10,
    sulphur.lube = 1000,
    computation = "multi.core",
    n.core = 4)
}

# Resuspension emissions based on custom EF
for(pol in c("PM10")){

  road_network <- main(fleet = fleet_example_4fluxes,
    traffic.df = road_network,
    n.traffic.flux = 4,
    pollutant = pol,
    emis.type = "resuspension-customEF",
    wear.source = NA,
    Surb = 0.804,
    L.trip = 12.5,
    perc.wet.d = 0.2,
    Ta = 8.5,
    reference.year = 2020,
    sulphur.diesel = 10,
    sulphur.petrol = 10,
    sulphur.lube = 1000,
    resusp.EF.pc = 12.5,
    resusp.EF.Lcat = 1.1,
    resusp.EF.lcv = 45,
    resusp.EF.hcv = 250,
    computation = "multi.core",
    n.core = 4)
}

# Non-exhaust emissions
for(sour in c("brake.wear", "surface.wear", "tyre.wear")){
  for(pol in c("TSP", "PM10", "PM2.5")){

    road_network <- main(fleet = fleet_example_4fluxes,
      traffic.df = road_network,
      n.traffic.flux = 4,
      emep.eea.year = 2020,
      pollutant = pol,
      emis.type = "PM.wear",
      wear.source = sour,
      Surb = 0.804,

```

```

    L.trip = 2.5,
    perc.wet.d = 0.2,
    Ta = 10,
    reference.year = 2017,
    sulphur.diesel = 10,
    sulphur.petrol = 10,
    sulphur.lube = 1000,
    computation = "multi.core",
    n.core = 4)
}
}

# Let's examine the output
road_network

## Simple feature collection with 4 features and 34 fields
## Geometry type: LINESTRING
## Dimension: XY
## Bounding box: xmin: 1 ymin: 1 xmax: 10 ymax: 3
## CRS: +proj=utm +zone=32 +datum=WGS84 +units=m +no_defs
##   letter          geometry road.length traffic.flux.pc
## 1      V  LINESTRING (1 3, 2 1, 3 3) 0.004472136          100
## 2      E  LINESTRING (5 1, 4 1, 4 2, ... 0.006000000          75
## 3      R  LINESTRING (6 1, 6 3, 7 3, ... 0.006414214          50
## 4      T  LINESTRING (8 3, 9 3, 9 1, ... 0.006000000          30
##   traffic.flux.Lcat traffic.flux.lcv traffic.flux.hcv traffic.speed.pc
## 1                10                15                2                70
## 2                40                15                7                70
## 3                10                30                5                70
## 4                 5                10                10                70
##   traffic.speed.Lcat traffic.speed.lcv traffic.speed.hcv   traffic.type
## 1                45                60                50   Urban Peak
## 2                45                60                50 Urban Off Peak
## 3                45                60                50         Rural
## 4                45                60                50   Highway
##   road.slope hdv.load  sL      emis_CO      emis_VOC      emis_SO2      emis_NH3
## 1      -0.02    0.0 0.2 0.0007331939 1.914952e-04 7.242136e-07 7.427194e-06
## 2       0.00    0.5 0.3 0.0016243768 5.325562e-04 1.190059e-06 9.211000e-06
## 3       0.02    0.5 0.4 0.0007577965 1.590683e-04 1.087168e-06 8.824058e-06
## 4       0.04    1.0 0.5 0.0002595472 6.674373e-05 1.143903e-06 5.018285e-06
##   emis_N2O      emis_NOx      emis_CH4 emis_PM.Exhaust emis_runningLosses_VOC
## 1 8.356665e-06 0.0002872645 9.049042e-06 5.988979e-06 3.869214e-06
## 2 9.726834e-06 0.0004639886 2.306441e-05 1.236062e-05 6.843480e-06
## 3 3.530245e-06 0.0005434518 7.171920e-06 6.855393e-06 9.797648e-06
## 4 2.241127e-06 0.0006820063 2.895485e-06 1.097837e-05 4.561893e-07
##   emis_PM10_resusp_EPA emis_PM10_resusp_customEF emis_brake.wear_TSP
## 1 0.0009468551 1.089412e-05 4.330576e-06
## 2 0.0018184606 2.043900e-05 7.441182e-06
## 3 0.0039884163 2.075640e-05 6.463377e-06
## 4 0.0073204470 1.998300e-05 5.661865e-06
##   emis_brake.wear_PM10 emis_brake.wear_PM2.5 emis_surface.wear_TSP
## 1 4.243965e-06 1.688925e-06 8.679822e-06
## 2 7.292358e-06 2.902061e-06 1.282481e-05

```

```
## 3      6.334109e-06      2.520717e-06      1.054411e-05
## 4      5.548628e-06      2.208127e-06      8.351601e-06
##   emis_surface.wear_PM10 emis_surface.wear_PM2.5 emis_tyre.wear_TSP
## 1      4.339911e-06      2.343552e-06      7.098311e-06
## 2      6.412405e-06      3.462699e-06      1.004305e-05
## 3      5.272057e-06      2.846911e-06      9.334321e-06
## 4      4.175801e-06      2.254932e-06      6.652993e-06
##   emis_tyre.wear_PM10 emis_tyre.wear_PM2.5
## 1      4.258986e-06      2.981290e-06
## 2      6.025830e-06      4.218081e-06
## 3      5.600593e-06      3.920415e-06
## 4      3.991796e-06      2.794257e-06
```

```
# Let's test the emission factors from 2023
for(sour in c("brake.wear", "surface.wear", "tyre.wear")){
  for(pol in c("TSP", "PM10", "PM2.5")){

    road_network_2023ef <- main(fleet = fleet_example_4fluxes,
                              traffic.df = road_network,
                              n.traffic.flux = 4,
                              emep.eea.year = 2023,
                              pollutant = pol,
                              emis.type = "PM.wear",
                              wear.source = sour,
                              Surb = 0.804,
                              L.trip = 2.5,
                              perc.wet.d = 0.2,
                              Ta = 10,
                              reference.year = 2017,
                              sulphur.diesel = 10,
                              sulphur.petrol = 10,
                              sulphur.lube = 1000,
                              computation = "multi.core",
                              n.core = 4)

  }
}
```

```
# Let's examine the output
road_network_2023ef
```

```
## Simple feature collection with 4 features and 35 fields
## Geometry type: LINESTRING
## Dimension: XY
## Bounding box: xmin: 1 ymin: 1 xmax: 10 ymax: 3
## CRS: +proj=utm +zone=32 +datum=WGS84 +units=m +no_defs
##   letter      geometry road.length traffic.flux.pc
## 1      V      LINESTRING (1 3, 2 1, 3 3) 0.004472136      100
## 2      E LINESTRING (5 1, 4 1, 4 2, ... 0.006000000      75
## 3      R LINESTRING (6 1, 6 3, 7 3, ... 0.006414214      50
## 4      T LINESTRING (8 3, 9 3, 9 1, ... 0.006000000      30
##   traffic.flux.Lcat traffic.flux.lcv traffic.flux.hcv traffic.speed.pc
## 1      10      15      2      70
## 2      40      15      7      70
## 3      10      30      5      70
```

```

## 4          5          10          10          70
## traffic.speed.Lcat traffic.speed.lcv traffic.speed.hcv traffic.type
## 1          45          60          50      Urban Peak
## 2          45          60          50 Urban Off Peak
## 3          45          60          50          Rural
## 4          45          60          50          Highway
## road.slope hdv.load sL      emis_CO      emis_VOC      emis_SO2      emis_NH3
## 1      -0.02      0.0 0.2 0.0007331939 1.914952e-04 7.242136e-07 7.427194e-06
## 2          0.00      0.5 0.3 0.0016243768 5.325562e-04 1.190059e-06 9.211000e-06
## 3          0.02      0.5 0.4 0.0007577965 1.590683e-04 1.087168e-06 8.824058e-06
## 4          0.04      1.0 0.5 0.0002595472 6.674373e-05 1.143903e-06 5.018285e-06
##      emis_N2O      emis_NOx      emis_CH4 emis_PM.Exhaust emis_runningLosses_VOC
## 1 8.356665e-06 0.0002872645 9.049042e-06 5.988979e-06 3.869214e-06
## 2 9.726834e-06 0.0004639886 2.306441e-05 1.236062e-05 6.843480e-06
## 3 3.530245e-06 0.0005434518 7.171920e-06 6.855393e-06 9.797648e-06
## 4 2.241127e-06 0.0006820063 2.895485e-06 1.097837e-05 4.561893e-07
## emis_PM10_resusp_EPA emis_PM10_resusp_customEF emis_brake.wear_TSP
## 1      0.0009468551      1.089412e-05      4.330576e-06
## 2      0.0018184606      2.043900e-05      7.441182e-06
## 3      0.0039884163      2.075640e-05      6.463377e-06
## 4      0.0073204470      1.998300e-05      5.661865e-06
## emis_brake.wear_PM10 emis_brake.wear_PM2.5 emis_surface.wear_TSP
## 1      4.243965e-06      1.688925e-06      8.679822e-06
## 2      7.292358e-06      2.902061e-06      1.282481e-05
## 3      6.334109e-06      2.520717e-06      1.054411e-05
## 4      5.548628e-06      2.208127e-06      8.351601e-06
## emis_surface.wear_PM10 emis_surface.wear_PM2.5 emis_tyre.wear_TSP
## 1      4.339911e-06      2.343552e-06      7.098311e-06
## 2      6.412405e-06      3.462699e-06      1.004305e-05
## 3      5.272057e-06      2.846911e-06      9.334321e-06
## 4      4.175801e-06      2.254932e-06      6.652993e-06
## emis_tyre.wear_PM10 emis_tyre.wear_PM2.5 emis_tyre.wear_PM2.5
## 1      4.258986e-06      2.981290e-06      2.869393e-06
## 2      6.025830e-06      4.218081e-06      4.083091e-06
## 3      5.600593e-06      3.920415e-06      3.696518e-06
## 4      3.991796e-06      2.794257e-06      2.756307e-06

```

```

# Now let's suppose we want to export NOx emissions in a format
# suitable for GRAL, the GRAz Lagrangian model.
# Supposing that the traffic data provided to VERT is representative
# of an hourly interval, we convert emissions from kg/h to kg/(km*h)
# and then we suppose that different road have different modulations,
# i.e. belong to different source group in the GRAL environment:

```

```

network4GRAL <- road_network %>%
  mutate(emis_NOx4GRAL = emis_NOx / road.length,
         sg = ifelse(traffic.type == "Urban Peak", 1,
                    ifelse(traffic.type == "Urban Off Peak", 2,
                          ifelse(traffic.type == "Rural", 3, 4))),
         road_width = ifelse(traffic.type == "Urban Peak", 5,
                             ifelse(traffic.type == "Urban Off Peak", 5,
                                   ifelse(traffic.type == "Rural", 7, 8))))

```

```

# Export the emissions

```

```
emis2GRAL(road_network = network4GRAL,  
  road_name = "letter",  
  source_group = "sg",  
  road_width = "road_width",  
  road_emis = "emis_NOx4GRAL",  
  share_pm2.5 = 0,  
  share_pm10 = 0,  
  pm_diam = 0,  
  pm_density = 0,  
  dry_dep_vel_pm2.5 = 0,  
  dry_dep_vel_pm10 = 0,  
  dry_dep_vel_pm30 = 0,  
  mode = 0,  
  dir_out = "~/Desktop/")
```
